# Supplementary material
Source: Springer Nature journal article supplement (https://www.springermedizin.de/resource/supplementary/12933_2009_215_MOESM2_ESM.pdf/9539874)
Supplement: MOESM2 [file 9539874]

P<0.0001

Ln-transformed YKL-40, median (95% CI)

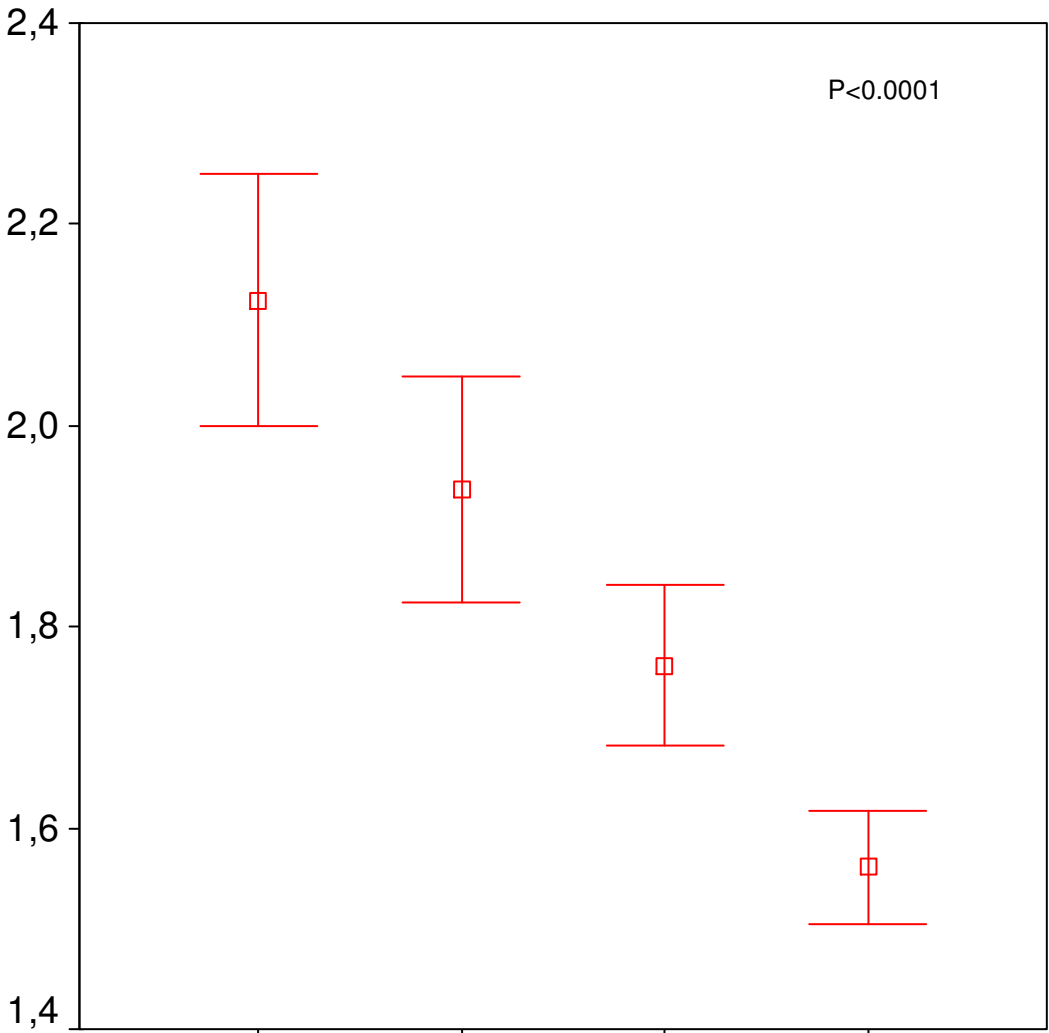

N = 46 45 58 55

Macroalbuminuria      Normoalbuminuria

Microalbuminuria      Controls
